# Supplementary material
Source: publisher figshare collection journal article supplement (https://acs.figshare.com/ndownloader/files/22729982)
Supplement: Supplementary file 1 [file 22729982]

**Identification of Metal-Binding Peptides and Their Conjugation onto Nanoparticles of Superparamagnetic Iron Oxides and Liposomes**

Tomonobu Kodama<sup>‡1,2</sup>, Akifumi Yoshihara<sup>‡1</sup>, Isha Goel<sup>1</sup>, Masaki Sekino<sup>1,3</sup>, Akihiro Kuwahata<sup>3</sup>, Atsushi Yoshimori<sup>4</sup>, Yuichi Murayama<sup>2</sup>, Kazuhiko Ishihara<sup>5</sup>, Kristina N Ekdahl<sup>6,7</sup>, Bo Nilsson<sup>6</sup>, and Yuji Teramura<sup>\*1,6</sup>

<sup>‡</sup>Contributed equally

\*Corresponding Author

Yuji TERAMURA

Tel: +81(0)3-5841-1174

E-mail: [teramura@bioeng.t.u-tokyo.ac.jp](mailto:teramura@bioeng.t.u-tokyo.ac.jp)

<sup>1</sup>Department of Bioengineering, School of Engineering, The University of Tokyo, 7-3-1 Hongo, Bunkyo-ku, Tokyo, 113-8656, Japan

<sup>2</sup>Department of Neurosurgery, The Jikei University School of Medicine, Tokyo, 105-8461, Japan.

<sup>3</sup>Department of Electrical Engineering and Information Systems, School of Engineering, The University of Tokyo, Tokyo, 113-8656, Japan.

<sup>4</sup>Institute for Theoretical Medicine, Inc., 26-1 Muraoka-Higashi 2-chome, Fujisawa, Kanagawa 251-0012, Japan

<sup>5</sup>Department of Material Engineering, School of Engineering, The University of Tokyo, 7-3-1 Hongo, Bunkyo-ku, Tokyo, 113-8656, Japan

<sup>6</sup>Department of Immunology, Genetics and Pathology (IGP), Uppsala University, Dag Hammarskjölds väg 20, SE-751 85, Uppsala, Sweden

<sup>7</sup>Linnaeus Center of Biomaterials Chemistry, Linnaeus University, SE-391 82 Kalmar, Sweden

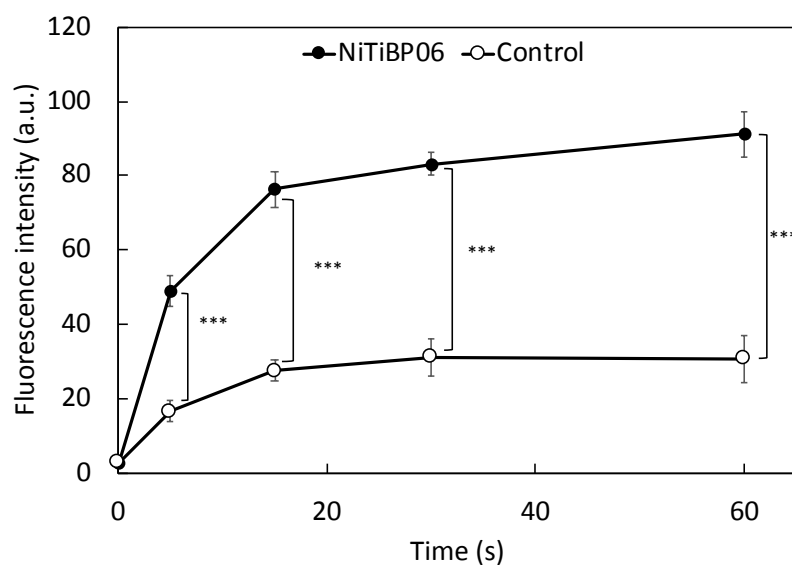

**Supplementary Figure S1.** Binding behavior of Ni-Ti-binding peptide with time. After Ni-Ti stent was exposed to human plasma, the stent was incubated in FITC-labelled NiTiBP06 solution (100  $\mu\text{g/mL}$ ) and the fluorescence from the surface was measured over time by upright fluorescence microscope. As a control, FITC-CoCrBP02 was used. Error bars indicate standard deviation;  $n=3$ .

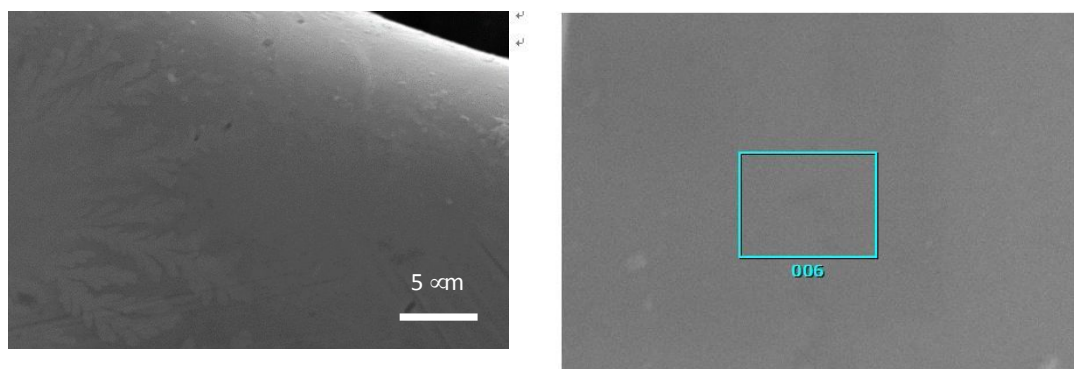

**Supplementary Figure S2.** SEM image of Ni-Ti stents after treatment with SPIOs and the elemental analysis.
